# Supplementary material for: Evolutionary transition from a single RNA replicator to a multiple replicator network
Source: PubMed Central journal article supplement (PMC8933500; doi:10.1038/s41467-022-29113-x), 2022-03-18
Supplement: 41467_2022_29113_MOESM3_ESM.pdf [file 41467_2022_29113_MOESM3_ESM.pdf]

## **Description of Additional Supplementary Files**

File Name: Supplementary Data 1

Description: The RNA sequences of the isolated clones and information on all analyzed genotypes.
